# Supplementary material for: Enteric neurons from Parkinson’s disease patients display ex vivo aberrations in mitochondrial structure
Source: PubMed Central journal article supplement (PMC5021970; doi:10.1038/srep33117), 2016-09-14
Supplement: srep33117-s3.pdf [file srep33117-s3.pdf]

**Enteric neurons from Parkinson's disease patients display ex vivo aberrations in mitochondrial structure.**

Baumuratov AS, Antony PMA, Ostaszewski M, He F, Salamanca L Antunes L, Weber J, Longhino L, Derkinderen P, Koopman WJH, Diederich NJ

Supplementary movie 1: Ganglion image analysis. Mitochondria and ganglion surfaces, eroded bodies, and skeletons in 3D
